# Supplementary material for: Topical Antibiotic Prophylaxis and Intravitreal Injections: Impact on the Incidence of Acute Endophthalmitis—A Nationwide Study in France from 2009 to 2018
Source: MDPI journal article supplement (doi:10.3390/pharmaceutics14102133), 2022-10-07
Supplement: s1 [file s1]

# Supplementary Materials: Topical Antibiotic Prophylaxis and Intravitreal Injections: Impact on the Incidence of Acute Endophthalmitis – A Nationwide Study in France from 2009 to 2018

Florian Baudin, Eric Benzenine, Anne-Sophie Mariet, Inès Ben Ghezala, Alain M. Bron, Vincent Daien, Pierre-Henry Gabrielle, Catherine Quantin and Catherine Creuzot-Garcher

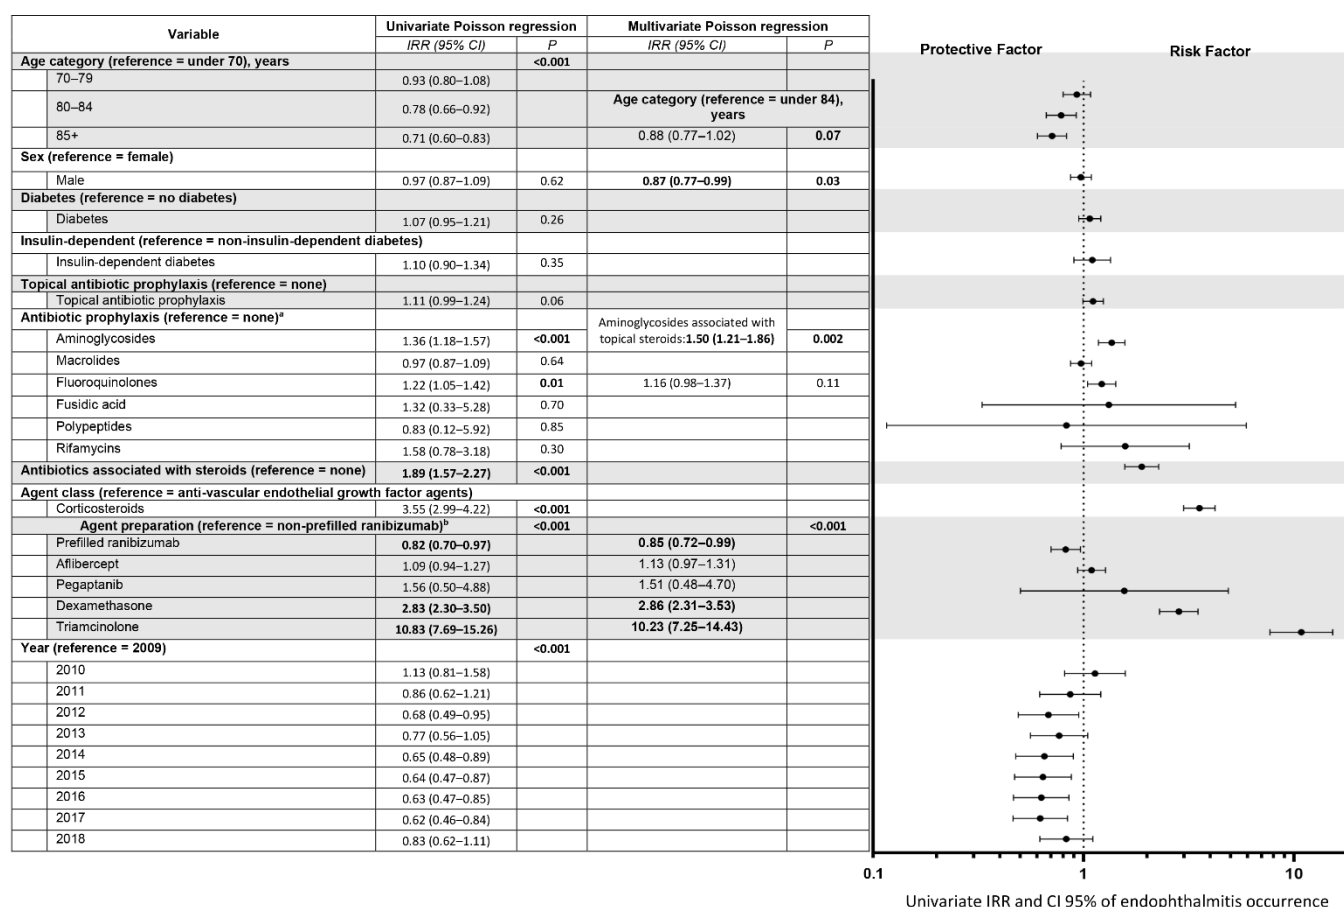

Figure S1. Study Design.
